# Supplementary material for: Tin-assisted growth of all-inorganic perovskite nanoplatelets with controllable morphologies and complementary emissions
Source: Royal Society of Chemistry journal article supplement (doi:10.1039/c9ce00027e), 2019-01-01
Supplement: c9ce00027e1.pdf [file c9ce00027e1.pdf]

## **Tin-Assisted Growth of All-Inorganic Perovskite Nanoplatelets with Controllable Morphologies and Complementary Emissions**

Yanxi Ding<sup>a</sup>, Tan Li<sup>a</sup>, Xiaoyun Li<sup>a</sup>, Emmanuel Acheampong Tsiwah<sup>a</sup>, Chengzhen Liu<sup>a</sup>, Peng Gao<sup>b,\*</sup>, Tao Zeng<sup>c</sup>, Yunxia Chen<sup>c,d</sup>, Xiujian Zhao<sup>a</sup>, Yi Xie<sup>a,\*</sup>

<sup>a</sup> *State Key Laboratory of Silicate Materials for Architectures, Wuhan University of Technology (WUT), No. 122, Luoshi Road, Wuhan 430070, P. R. China.*

<sup>b</sup> *Laboratory of Advanced Functional Materials, Xiamen Institute of Rare-earth Materials, Chinese Academy of Science, No 1300 Jimei Road, Jimei District, 361021, Xiamen, Fujian, P.R. China.*

<sup>c</sup> *School of Materials Science and Engineering, Jingdezhen Ceramic Institute (Xianghu Campus), Xianghu Road, Jingdezhen, Jiangxi 333403, P.R. China.*

<sup>d</sup> *National Engineering Research Center for Domestic & Building Ceramics, Jingdezhen Ceramic Institute (Xinchang Campus), Taoyang Southern Road, Jingdezhen, Jiangxi, 333000, PR China.*

*Email: xiey@whut.edu.cn; peng.gao@fjirsm.ac.cn.*

## Contents

|                                                                                                                                                           |    |
|-----------------------------------------------------------------------------------------------------------------------------------------------------------|----|
| 1. Characterization of the CsPbBr <sub>3</sub> nanocrystals achieved in the presence of SnBr <sub>4</sub> 错误!未定义书签。                                       |    |
| 2. Characterization of the CsPbCl <sub>x</sub> Br <sub>3-x</sub> nanocrystals achieved in the presence of SnCl <sub>4</sub> .....                         | 5  |
| 3. Characterization of the CsPbBr <sub>3</sub> nanocrystals achieved in the presence of SnBr <sub>2</sub> under Ar atmosphere.....                        | 8  |
| 4. Characterization of the perovskite CsPbCl <sub>3-x</sub> Br <sub>3</sub> NC synthesized in the presence of SnCl <sub>2</sub> under Ar atmosphere ..... | 9  |
| 5. Characterization of the CsPbBr <sub>3</sub> nanocrystals achieved in the presence of SnBr <sub>2</sub> in the open air .....                           | 10 |
| 6. Characterization of the CsPbCl <sub>3-x</sub> Br <sub>3</sub> nanocrystals synthesized in the presence of SnCl <sub>2</sub> in the open air .....      | 14 |
| 7. Characterization of the CsPbBr <sub>3</sub> nanocrystals synthesized in the presence of NaBr, tin acetate and TiCl <sub>4</sub> , respectively.....    | 17 |
| 8. Characterization of the WLED devices .....                                                                                                             | 19 |
| 9. Anions exchange on the as-synthesized CsPbBr <sub>3</sub> nanocrystals.....                                                                            | 21 |
| References.....                                                                                                                                           | 23 |

## 1. Characterization of the CsPbBr<sub>3</sub> nanocrystals achieved in the presence of SnBr<sub>4</sub>

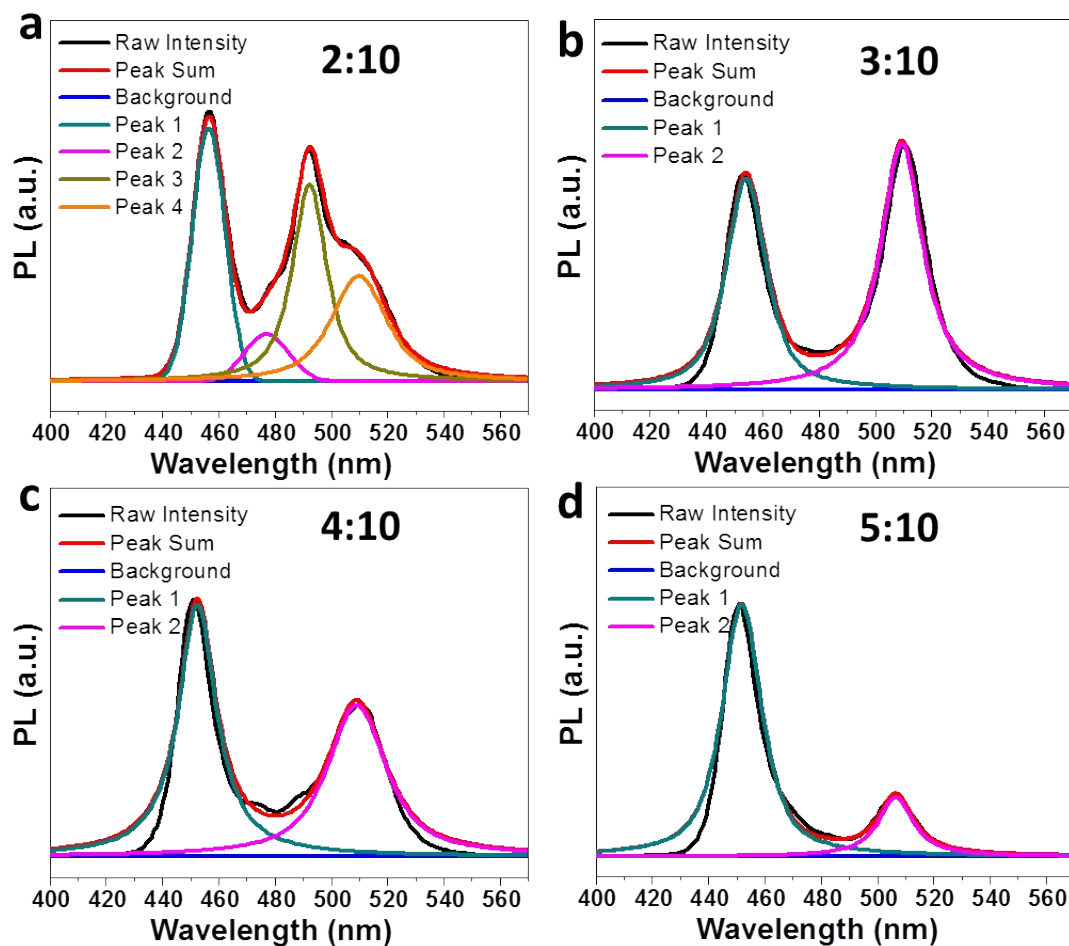

**Fig. S1.** Multi-peak fitting of the PL spectra for the CsPbBr<sub>3</sub> nanocrystals achieved with different Sn:Pb precursor ratios as dictated. The multi-peak-emitting spectra were fitted by the type of Gaussian. The peak positions extracted from the fit are listed in Table S1. The results indicate that the as-synthesized samples consist of NPLs with different sizes (in thickness). The samples are synthesized in the presence of SnBr<sub>4</sub>.

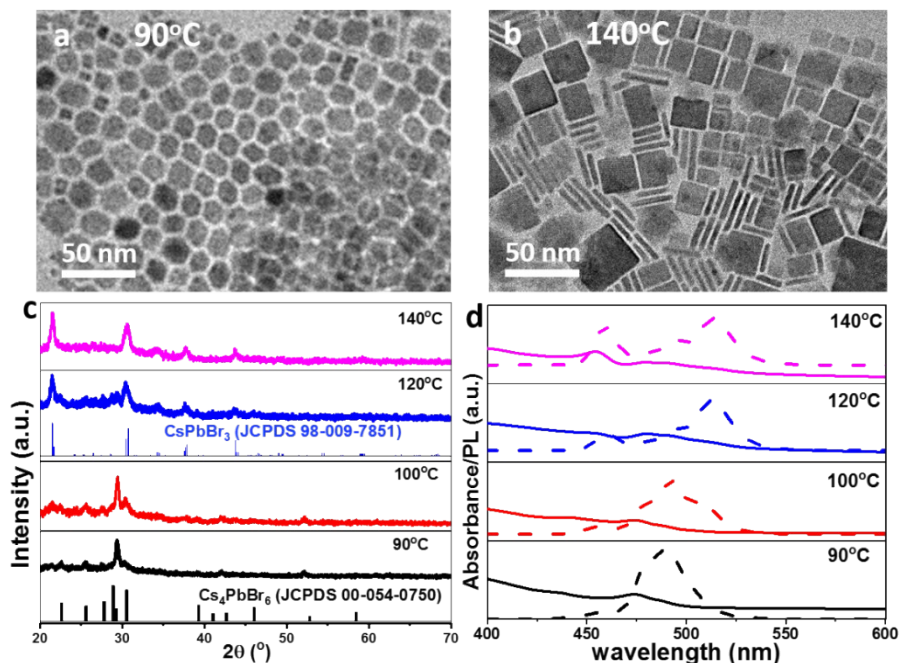

**Fig. S2.** TEM images (a-c), optical absorbance spectra (d) and PL (e) of the aliquots of the  $\text{CsPbBr}_3$  nanocrystals achieved at different temperatures as dictated, in the absence of precursor  $\text{Sn}:\text{Pb}$  ratios of 2:10. The samples are synthesized in the presence of  $\text{SnBr}_4$ .

**Table S1.** The summarization on the optical characterization of the  $\text{CsPbBr}_3$  nanocrystals achieved in the presence of different  $\text{Sn}:\text{Pb}$  precursor ratios.

| Sn:Pb ratio | PL peaks <sup>a</sup> (nm) |        |        |        | FWHM <sup>b</sup> (nm) |        |        |        |
|-------------|----------------------------|--------|--------|--------|------------------------|--------|--------|--------|
|             | Peak1                      | Peak 2 | Peak 3 | Peak 4 | Peak1                  | Peak 2 | Peak 3 | Peak 4 |
| 2:10        | 456.4                      | 477.0  | 492.0  | 509.8  | 13.7                   | 18.8   | 14.5   | 23.5   |
| 3:10        | 454.1                      | 509.3  |        |        | 16.8                   | 17.7   |        |        |
| 4:10        | 452.4                      | 509.0  |        |        | 16.2                   | 24.9   |        |        |
| 5:10        | 451.8                      | 506.5  |        |        | 16.9                   | 14.9   |        |        |

<sup>a</sup> Dual PL peaks after deconvolution.

<sup>b</sup> Full width at half-maximum (FWHM) of each PL peak after deconvolution.

## 2. Characterization of the $\text{CsPbCl}_x\text{Br}_{3-x}$ nanocrystals achieved in the presence of $\text{SnCl}_4$

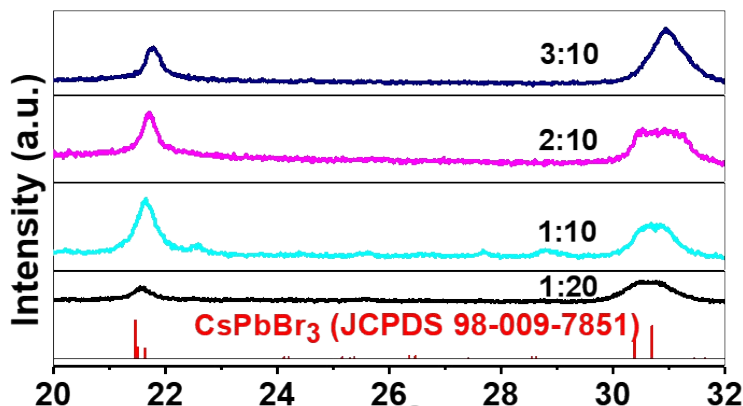

**Fig. S3.** XRD patterns ranging 20-32 degree of the  $\text{CsPbCl}_{3-x}\text{Br}_3$  nanocrystals achieved with different precursor Sn:Pb ratios as dictated. All the nanocrystals are obtained in the presence of  $\text{SnCl}_4$ .

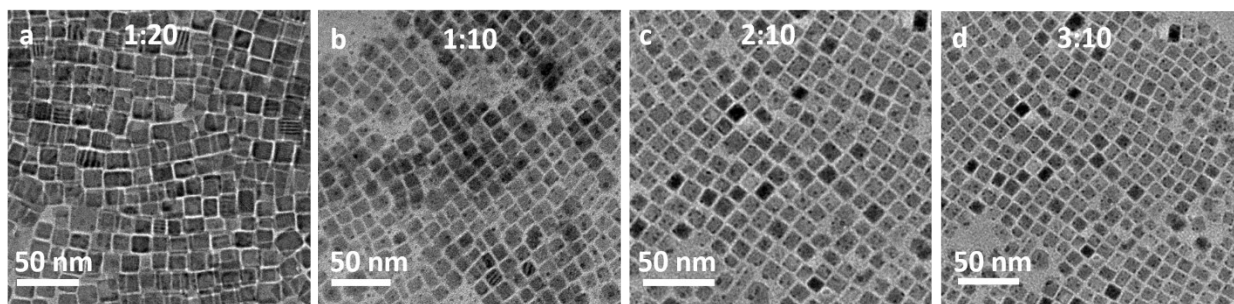

**Fig. S4.** TEM images of the perovskite  $\text{CsPbCl}_{3-x}\text{Br}_3$  NC achieved with different precursor Sn:Pb ratios as dictated. All the nanocrystals are obtained in the presence of  $\text{SnCl}_4$ .

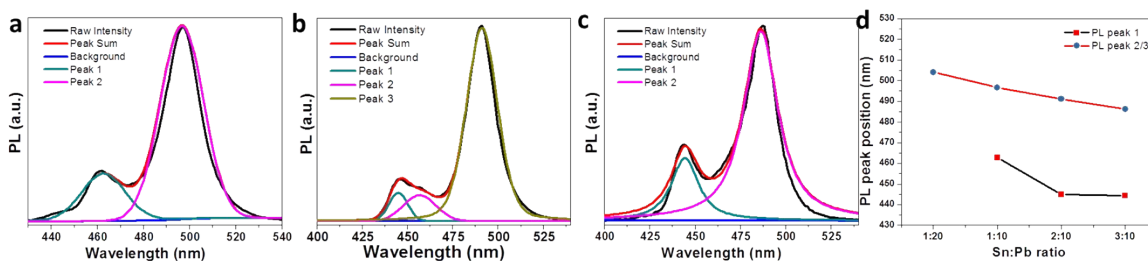

**Fig. S5.** (a-c) Deconvolution of the PL spectra collected on the  $\text{CsPbCl}_{3-x}\text{Br}_3$  nanocrystals achieved with precursor Sn:Pb ratios of 1:10 (a), 2:10 (b) and 3:10 (c). For data fitting, a doublet was used for each PL spectrum. All the nanocrystals are obtained in the presence of

*SnCl<sub>4</sub>. (d) PL peak wavelength positions of the fitted peaks of the various CsPbCl<sub>3-x</sub>Br<sub>3</sub> nanocrystals achieved with different precursor Sn:Pb ratios.*

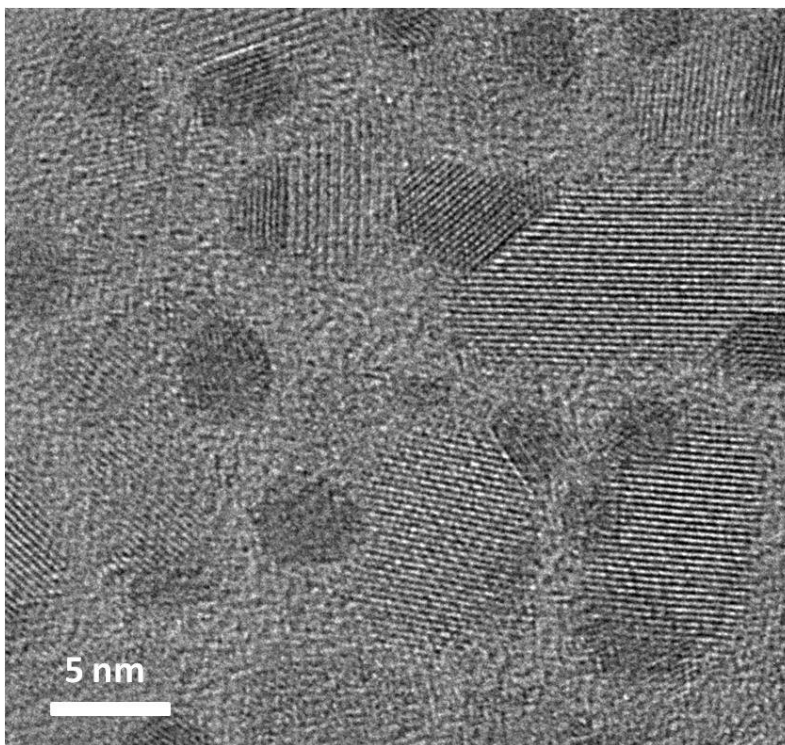

**Fig. S6.** HRTEM image of CsPbCl<sub>3-x</sub>Br<sub>3</sub> nanocrystals upon E-beam irradiation for 10 seconds. The sample was prepared in the presence of SnCl<sub>4</sub>, by fixing precursor Sn:Pb molar ratio as 2:10.

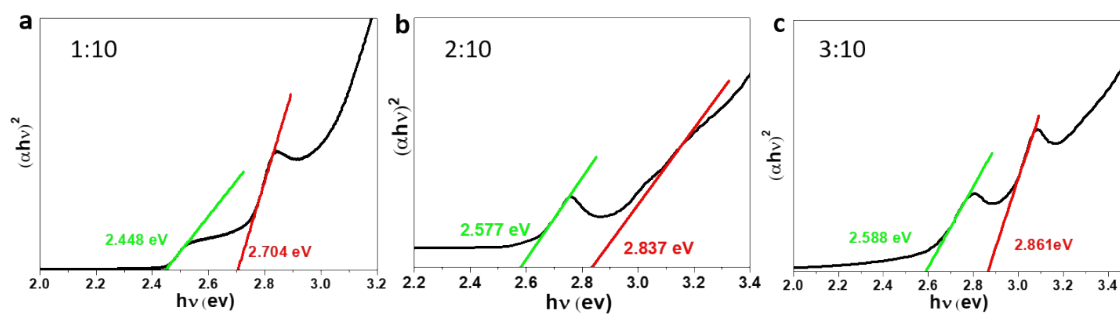

**Fig. S7.** Tauc plots of CsPbBr<sub>3</sub> nanocrystals formed in the presence of different precursor Sn:Pb ratios as dictated. The samples are synthesized in the presence of SnCl<sub>4</sub>.

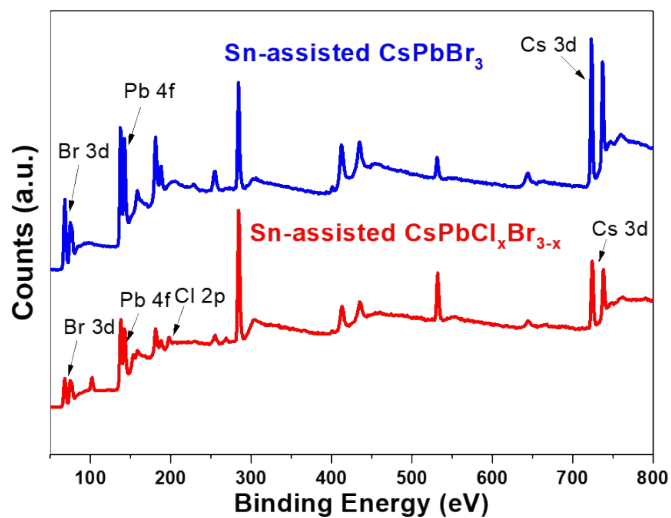

**Fig. S8.** Survey XPS of Sn-directed synthesized CsPbBr<sub>3</sub> nanocrystals and CsPbCl<sub>x</sub>Br<sub>3-x</sub> in the presence of SnBr<sub>4</sub> and SnCl<sub>4</sub>, respectively. It is noteworthy that no Sn signal can be detected in all the as-synthesized samples. Cl signals is present in the sample collected when SnCl<sub>4</sub> is added.



### 3. Characterization of the CsPbBr<sub>3</sub> nanocrystals achieved in the presence of SnBr<sub>2</sub> under Ar atmosphere

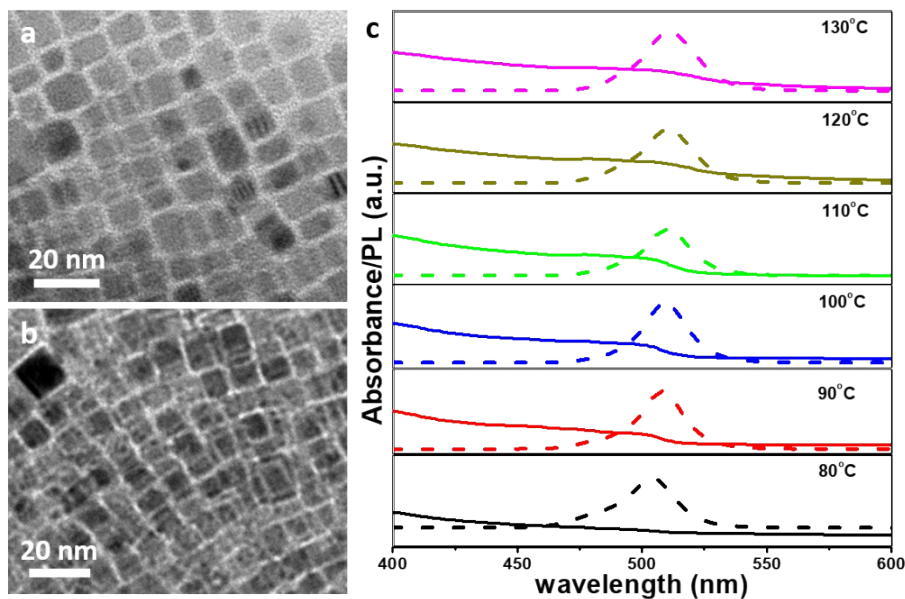

**Fig. S9.** (a-b) TEM images of the CsPbBr<sub>3</sub> nanocrystals achieved at 100°C (a) and 130°C (b), respectively. (c) Optical absorbance spectra (solid lines) and PL (dash lines) of the aliquots of the CsPbBr<sub>3</sub> nanocrystals achieved at different temperatures as dictated, in the presence of precursor SnBr<sub>2</sub> under Ar atmosphere.

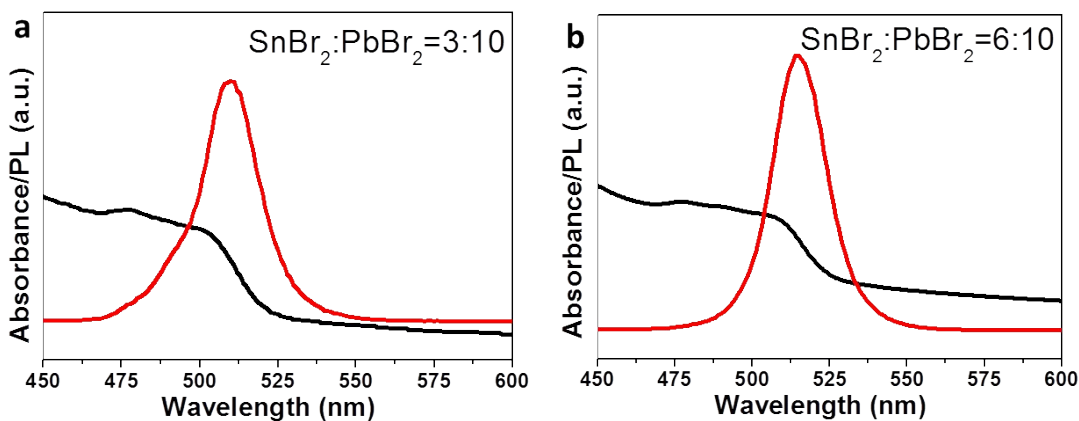

**Fig. S10.** Optical absorbance spectra (black lines) and PL (red lines) of CsPbBr<sub>3</sub> nanocrystals achieved in the presence of different amounts of SnBr<sub>2</sub> (denoted as Sn:Pb as dictated) under Ar atmosphere.



4. Characterization of the perovskite  $\text{CsPbCl}_{3-x}\text{Br}_x$  NC synthesized in the presence of  $\text{SnCl}_2$  under Ar atmosphere

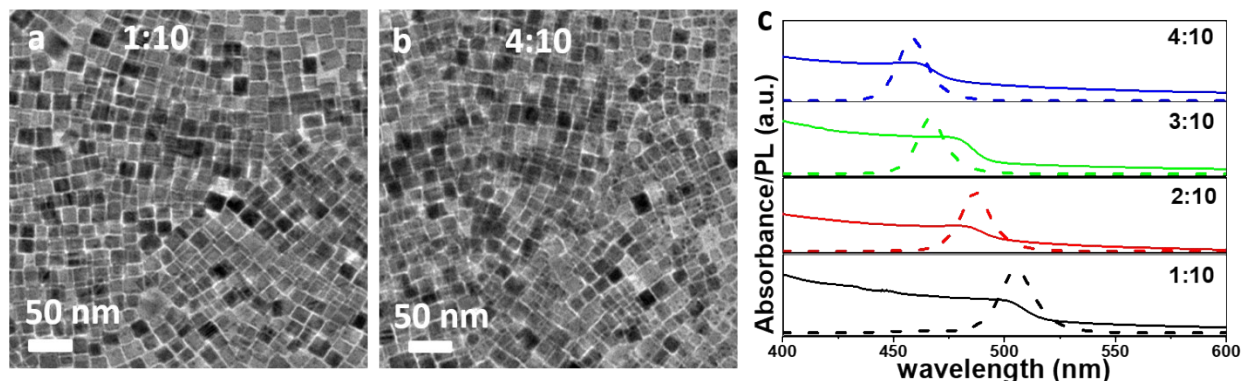

**Fig. S11.** (a-b) TEM images and (c) absorption spectra (solid curves) and PL emissions (dash curves) of the  $\text{CsPbCl}_x\text{Br}_{3-x}$  nanocrystals synthesized in the presence of  $\text{SnCl}_2$  under Ar atmosphere, with different precursor Sn:Pb ratios as dictated.

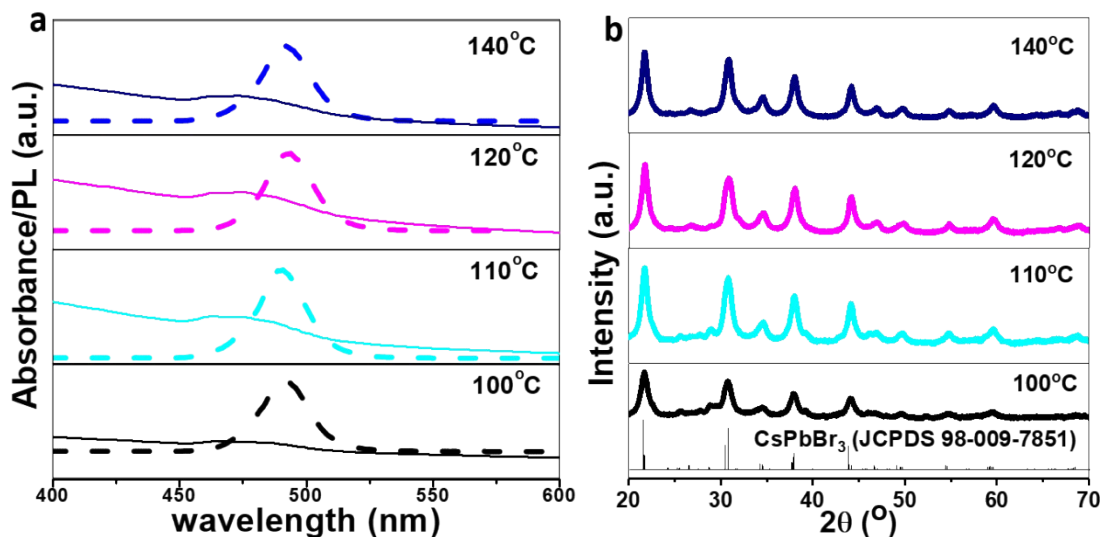

**Fig. S12.** Optical absorbance spectra and PL (a) and XRD patterns (b) of the aliquots of the  $\text{CsPbBr}_3$  nanocrystals achieved at different temperatures as dictated, in the absence of precursor Sn:Pb ratio of 2:10.

## 5. Characterization of the CsPbBr<sub>3</sub> nanocrystals achieved in the presence of SnBr<sub>2</sub> in the open air

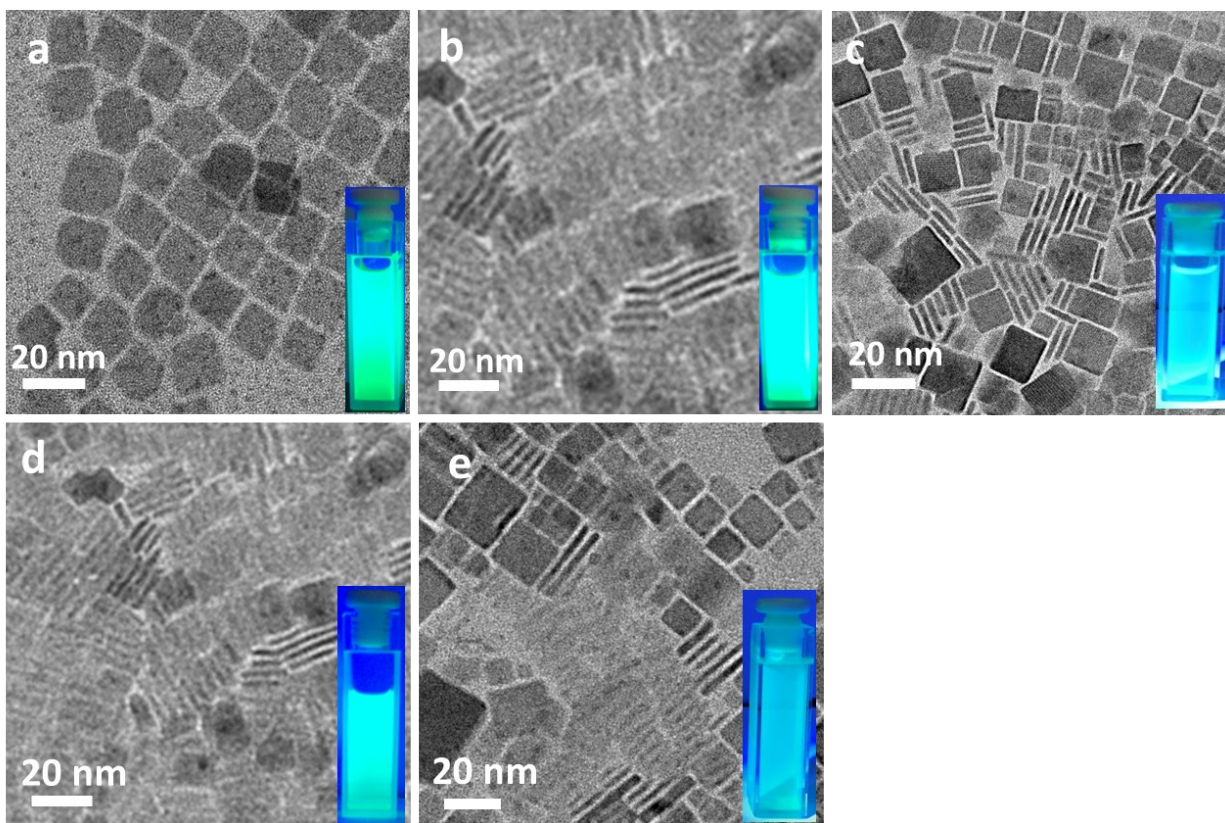

**Fig. S13.** TEM images of the perovskite CsPbBr<sub>3</sub> NC achieved with precursor Sn:Pb ratios of 1:10 (a), 2:10 (b), 3:10 (c), 4:10 (d) and 5:10 (e). Insets in each panel present the photographs of corresponding nanocrystals dispersed in hexane under UV light illumination (355 nm excitation wavelength).

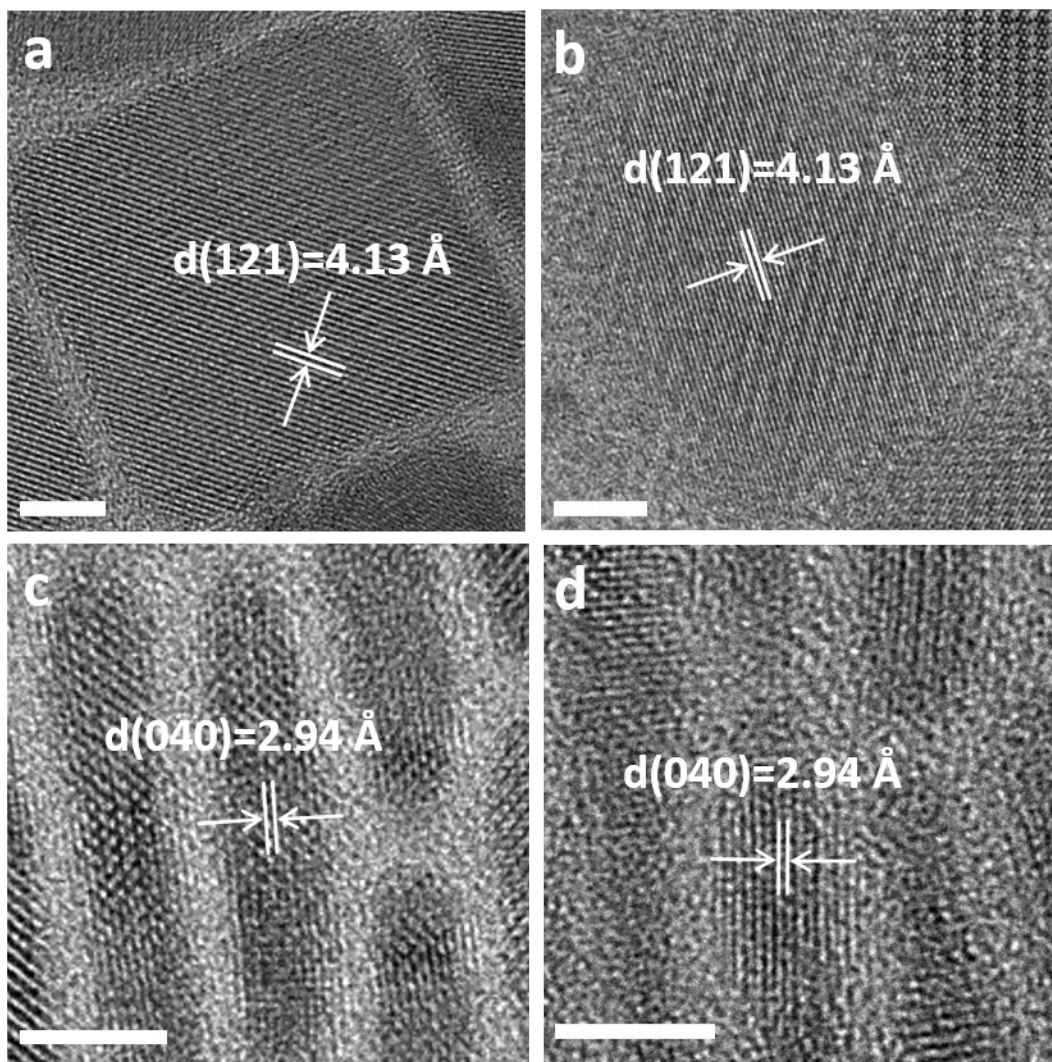

**Fig. S14.** Top view (a-b) and side view (c-d) HRTEM images of the typical perovskite  $\text{CsPbBr}_3$  NPLs collected from the top layer dispersion by centrifugation selection. The samples were synthesized in the open air, with Sn:Pb precursor ratios of 2:10 (a,c) and 5:10 (b,d), respectively. Each scale bar is 5 nm. The Sn precursor was  $\text{SnBr}_2$ .

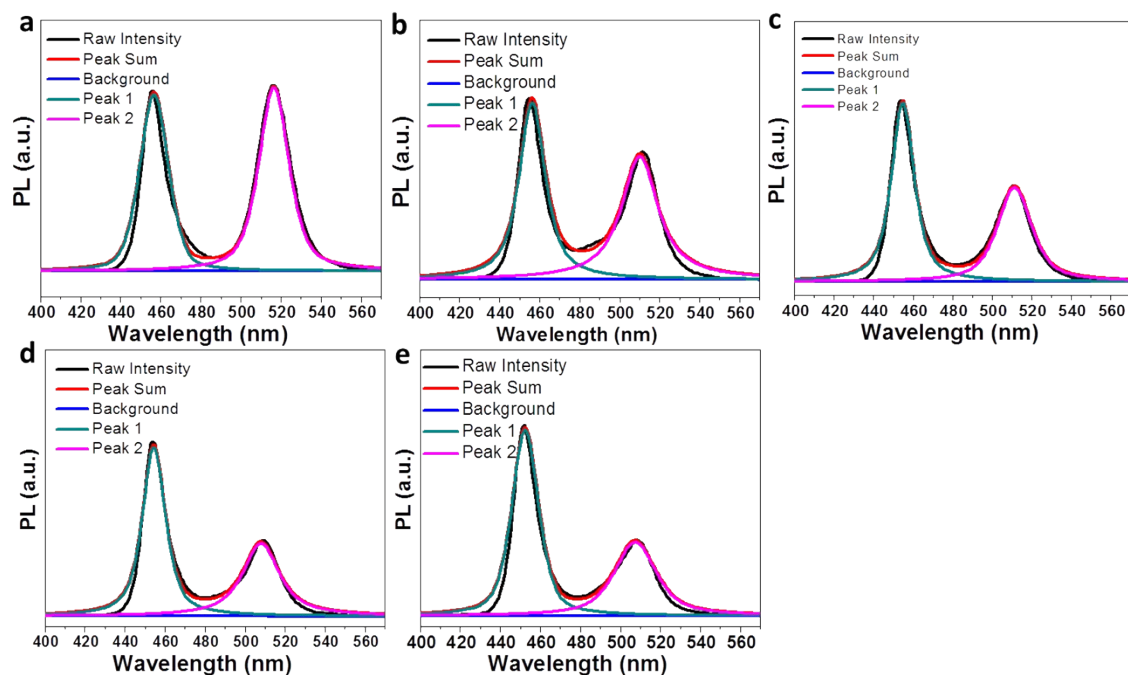

**Fig. S15.** Multi-peak fitting of the PL spectra for the  $\text{CsPbBr}_3$  nanocrystals achieved with precursor Sn:Pb ratios of 1:10 (a), 2:10 (b), 3:10 (c), 4:10 (d) and 5:10 (e). The multi-peak-emitting spectra were fitted by the type of Gaussian.

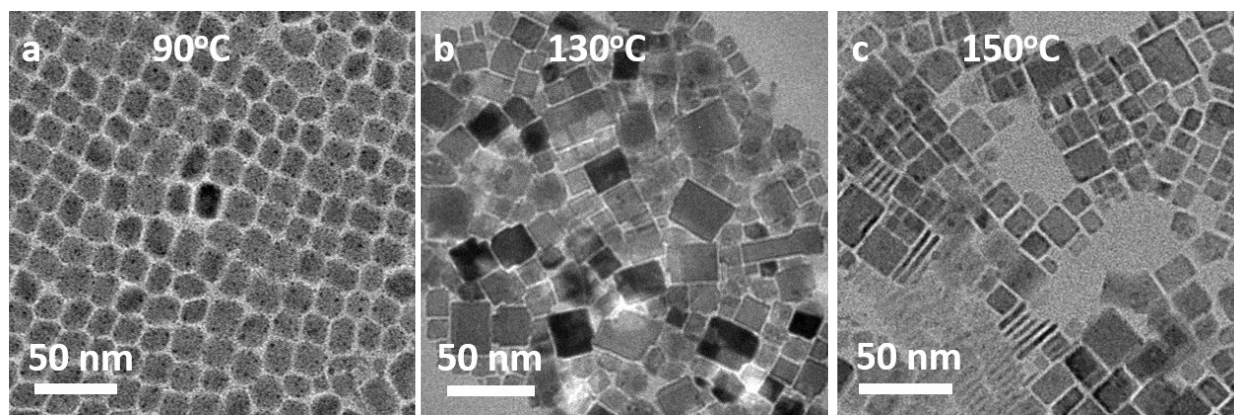

**Fig. S16.** TEM images (a-c), optical absorbance spectra and PL (d) and XRD patterns (e) of the aliquots of the  $\text{CsPbBr}_3$  nanocrystals achieved at different temperatures as dictated, in the presence of precursor Sn:Pb ratios of 2:10 in the open air.



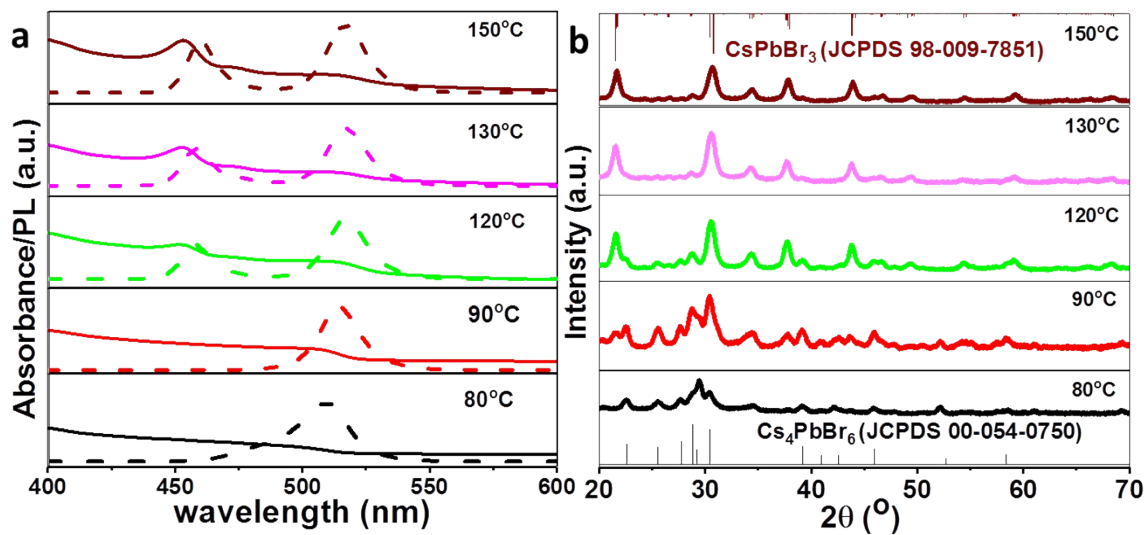

**Fig. S17.** Optical absorbance spectra and PL (a) and XRD patterns (b) of the aliquots of the CsPbBr<sub>3</sub> nanocrystals achieved at different temperatures as dictated, in the presence of precursor Sn:Pb ratios of 2:10 in the open air.

**6. Characterization of the  $\text{CsPbCl}_{3-x}\text{Br}_3$  nanocrystals synthesized in the presence of  $\text{SnCl}_2$  in the open air**

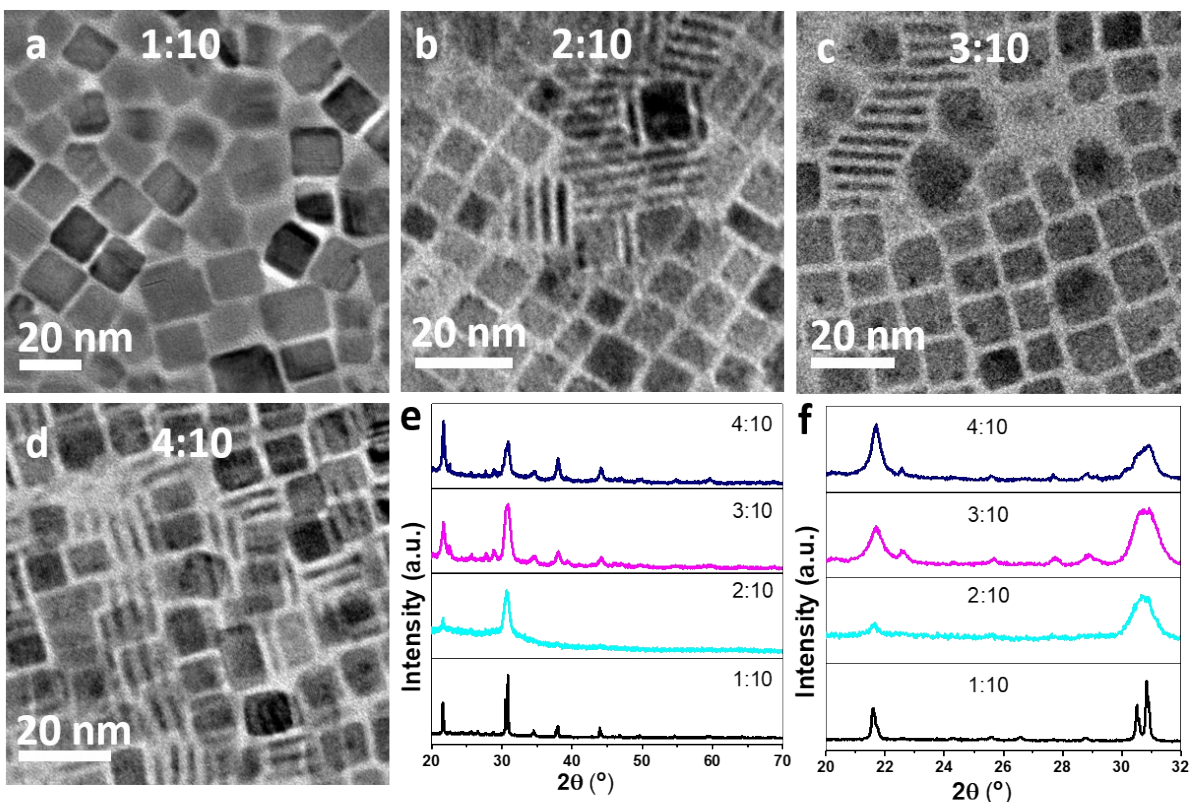

**Fig. S18.** (a-d) TEM images and (e-f) XRD patterns of the perovskite  $\text{CsPbCl}_{3-x}\text{Br}_3$  nanocrystals achieved in the presence of  $\text{SnCl}_2$ , in the open air, with precursor Sn:Pb ratios of 1:10 (a), 2:10 (b), 3:10 (c) and 4:10 (d), respectively. Panels b-e) display NPLs both standing edge-on perpendicular to the substrate and laying on the substrate.

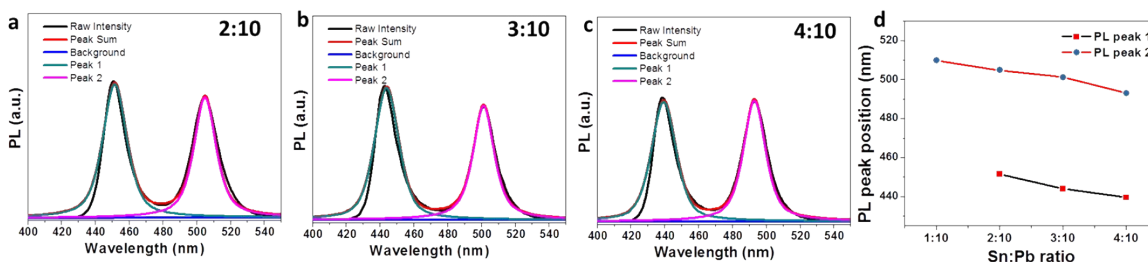

**Fig. S19.** (a-c) Deconvolution of the PL spectra collected on the perovskite  $\text{CsPbCl}_{3-x}\text{Br}_3$  nanocrystals of the  $\text{CsPbCl}_{3-x}\text{Br}_3$  nanocrystals achieved in the presence of  $\text{SnCl}_2$ , in the open air, with different precursor Sn:Pb ratios as dictated. For data fitting, a doublet was used for each

PL spectrum. (d) PL peak wavelength positions of the fitted peaks of the various  $\text{CsPbCl}_{3-x}\text{Br}_3$  nanocrystals achieved with different precursor Sn:Pb ratios.

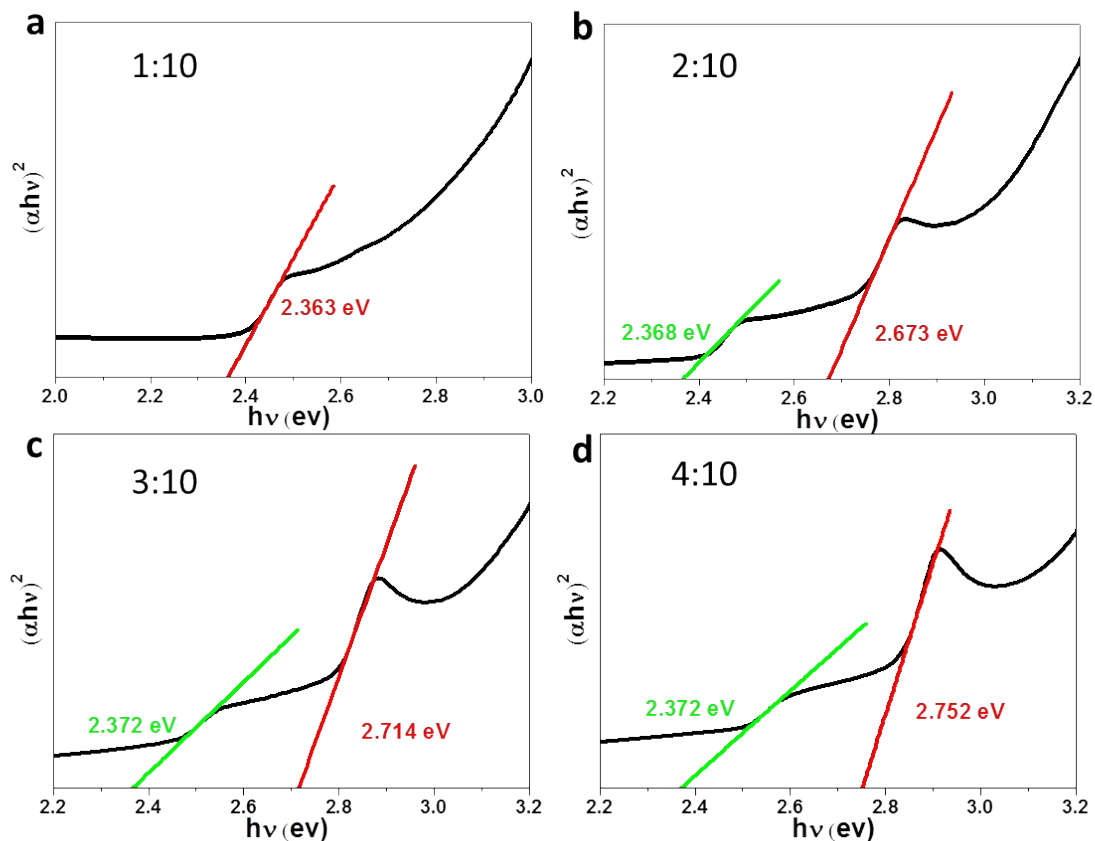

**Fig. S20.** Tauc plots of various  $\text{CsPbCl}_{3-x}\text{Br}_3$  nanocrystals formed in the presence of different precursor Sn:Pb ratios as dictated. The samples are prepared in the open air, in the presence of  $\text{SnBr}_2$  in the open air.



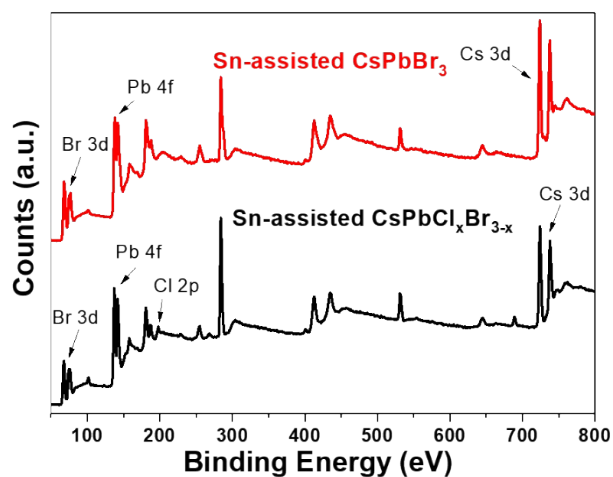

**Fig. S21.** Survey XPS of the Sn-directed synthesized  $\text{CsPbBr}_3$  nanocrystals and  $\text{CsPbCl}_x\text{Br}_{3-x}$  in the open air, in the presence of  $\text{SnBr}_2$  and  $\text{SnCl}_2$ , respectively. It is noteworthy that no Sn signal can be observed in all the as-synthesized samples. Cl signals is present in the sample collected when  $\text{SnCl}_2$  is added.

**Table S2.** Photoluminescence quantum yields (PLQY) of the various  $\text{CsPbBr}_3$  and  $\text{CsPbCl}_x\text{Br}_{3-x}$  perovskite nanocrystals.

| Samples                                                                                                           | PLQY (%) |
|-------------------------------------------------------------------------------------------------------------------|----------|
| $\text{CsPbBr}_3$ nanocrystals achieved in the absence of any Sn species                                          | 19.67    |
| $\text{CsPbBr}_3$ nanocrystals achieved with precursor $\text{SnBr}_4:\text{PbBr}_2$ ratio of 2:10                | 29.30    |
| $\text{CsPbCl}_x\text{Br}_{3-x}$ nanocrystals achieved with precursor $\text{SnCl}_4:\text{PbBr}_2$ ratio of 2:10 | 37.60    |
| $\text{CsPbBr}_3$ nanocrystals achieved with precursor $\text{SnBr}_2:\text{PbBr}_2$ ratio of 3:10                | 80.20    |
| $\text{CsPbCl}_x\text{Br}_{3-x}$ nanocrystals achieved with precursor $\text{SnCl}_2:\text{PbBr}_2$ ratio of 2:10 | 43.60    |

7. Characterization of the CsPbBr<sub>3</sub> nanocrystals synthesized in the presence of NaBr, tin acetate and TiCl<sub>4</sub>, respectively

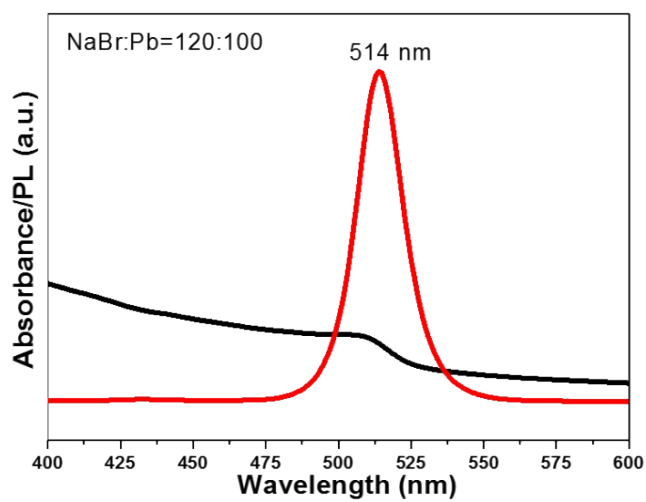

**Fig. S22.** Optical absorbance spectra and PL the CsPbBr<sub>3</sub> nanocrystals achieved in the presence of excess NaBr by fixing the NaBr:PbBr<sub>2</sub>=120:100.

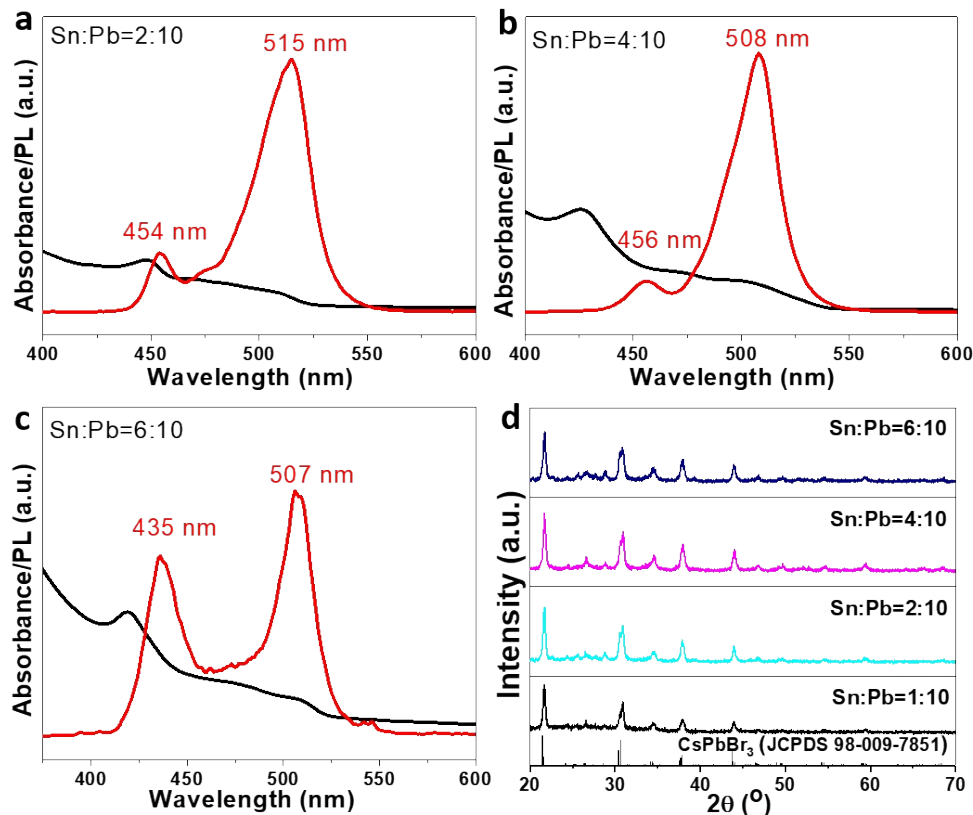

**Fig. S23.** (a-c) Optical absorbance spectra and PL and (d) XRD patterns of the various  $\text{CsPbBr}_3$  nanocrystals achieved with different amounts of  $\text{Sn}(\text{OAc})_2$  (labelled as Sn:Pb) as dictated, in the open air.

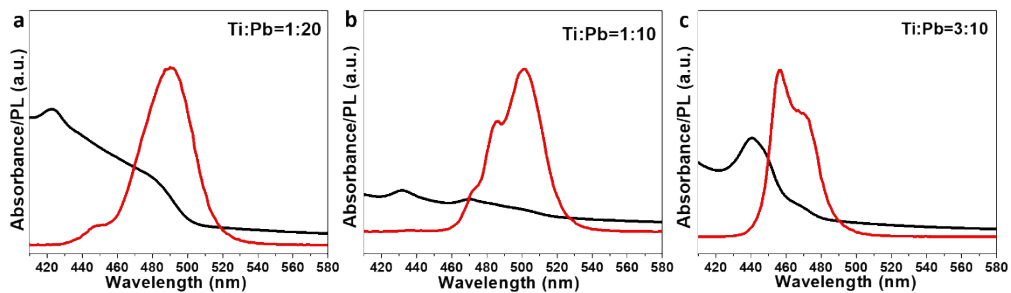

**Fig. S24.** Optical absorbance spectra and PL of the  $\text{CsPbCl}_x\text{Br}_{3-x}$  nanocrystals synthesized in the presence of different amounts of  $\text{TiCl}_4$  (labelled as Ti:Pb ratio), at argon atmosphere.

## 8. Characterization of the WLED devices

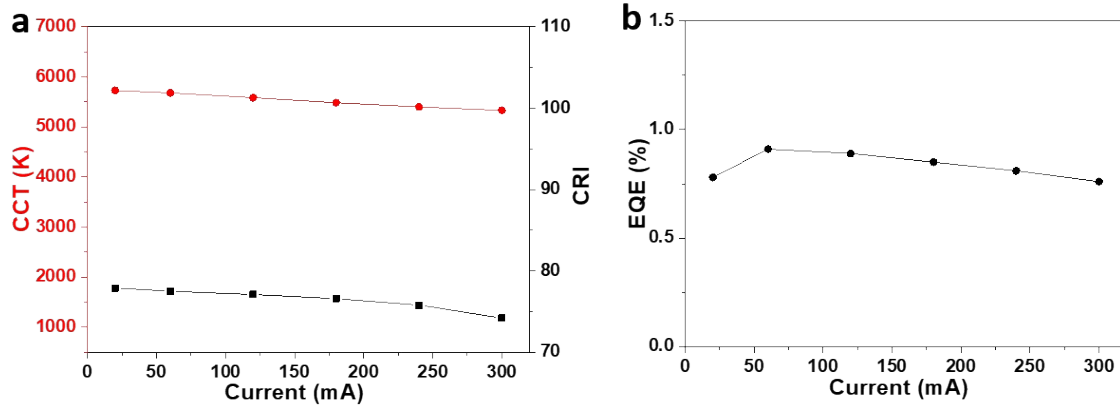

*Fig. S25. CCT and CRI (a), and EQE (b) values of the CsPbBr<sub>3</sub>-based WLED lamp under different drive currents*

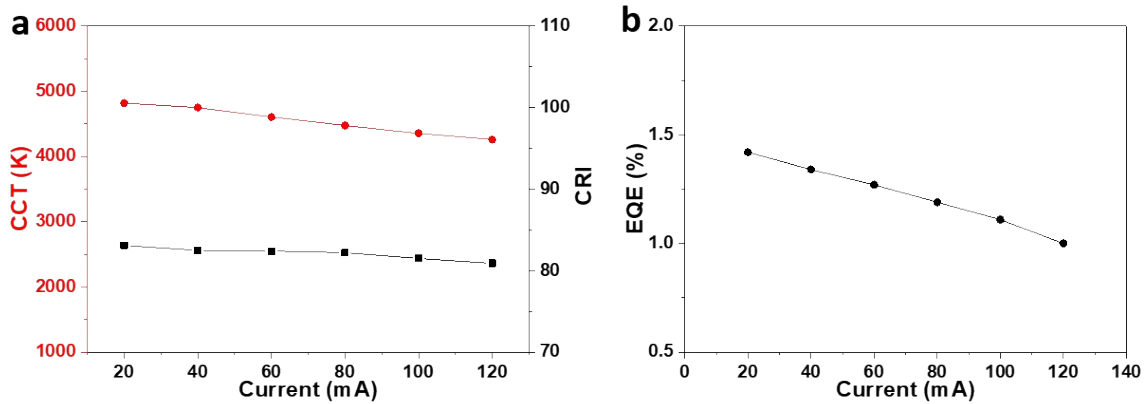

*Fig. S26. CCT and CRI (a), and EQE (b) values of the Sn-CsPbBr<sub>3</sub>-based WLED lamp under different drive currents.*

**Table S3.** CIE color coordinates ( $x$ ,  $y$ ), CRI, CCT, EQE and luminous efficacy of CsPbBr<sub>3</sub>-based WLED.

| WLED | I(mA) | CIE(x) | CIE(y) | CRI  | CCT (K) | EQE   | Luminous efficacy (lm/W) |
|------|-------|--------|--------|------|---------|-------|--------------------------|
| 1    | 20    | 0.3269 | 0.3554 | 77.9 | 5730    | 0.78% | 1.53                     |
| 2    | 60    | 0.3283 | 0.3481 | 77.5 | 5680    | 0.91% | 1.68                     |
| 3    | 120   | 0.3305 | 0.3434 | 77.1 | 5585    | 0.89% | 1.57                     |
| 4    | 180   | 0.3328 | 0.338  | 76.6 | 5484    | 0.85% | 1.41                     |
| 5    | 240   | 0.3345 | 0.3322 | 75.8 | 5401    | 0.81% | 1.28                     |
| 6    | 300   | 0.3357 | 0.3255 | 74.2 | 5332    | 0.76% | 1.16                     |

**Table S4.** CIE color coordinates ( $x$ ,  $y$ ), CRI, CCT, EQE and luminous efficacy of Sn-CsPbBr<sub>3</sub>-based WLED.

| WLED | I(mA) | CIE(x) | CIE(y) | CRI  | CCT(K) | EQE   | Luminous efficacy (lm/W) |
|------|-------|--------|--------|------|--------|-------|--------------------------|
| 1    | 20    | 0.3513 | 0.3634 | 83.1 | 4820   | 1.42% | 2.83                     |
| 2    | 40    | 0.3516 | 0.3512 | 82.7 | 4752   | 1.34% | 2.72                     |
| 3    | 60    | 0.3547 | 0.3455 | 82.4 | 4607   | 1.27% | 2.27                     |
| 4    | 80    | 0.3574 | 0.3412 | 82.2 | 4478   | 1.19% | 2.06                     |
| 5    | 100   | 0.3597 | 0.3366 | 81.5 | 4356   | 1.11% | 1.83                     |
| 6    | 120   | 0.3615 | 0.3328 | 80.9 | 4261   | 1.00% | 1.62                     |

## 9. Anions exchange on the as-synthesized CsPbBr<sub>3</sub> nanocrystals

**Preparation of PbCl<sub>2</sub> and PbI<sub>2</sub> stock solution.** PbX<sub>2</sub> (X=Cl, I) stock solutions were prepared by using modified procedures previously-reported by Manna and co-workers. In the case of PbCl<sub>2</sub> solution, PbCl<sub>2</sub> (83.3 mg, 0.3 mmol), TOP (1.0 ml), OA (0.5 mL), OM (0.5 ml), and ODE (7.5 ml) were loaded into a 50 mL three-neck flask. The temperature was then raised to 140 °C under vacuum and kept at 140 °C for 60 min. The resulting PbBr<sub>2</sub> stock solution was cooled to RT, transferred to a vial and stored in the glove box for further use. For PbI<sub>2</sub> solution, PbI<sub>2</sub> (138 mg, 0.4 mmol), OA (0.375 ml), OM (0.375 ml), and ODE (7.5 ml) were loaded into a 50 ml three-neck flask, followed by raising the temperature to 130 °C under vacuum and keeping it for 60 min. The resulting PbI<sub>2</sub> stock solution was cooled to RT for further use.

**Anion exchange reactions.** Anion exchange was performed in the Ar-filled glovebox, by using a modified procedure described by Akkerman *et al.*<sup>[1]</sup> Typically, different quantities (normally ranging from 10 to 500 μL) of 0.06 M halide precursors solution were swiftly injected in 10 vials, each holding 3 mL of diluted crude CsPbBr<sub>3</sub> NC solution (in hexane). The reactions were kept for 1 h and the dispersions were transferred in the cuvettes for subsequent optical tests.

Both the UV-Vis absorption and PL emission spectra of the CsPbCl<sub>x</sub>Br<sub>3-x</sub> nanocrystals collected by ion exchange with Cl<sup>-</sup> showed a blue shift with increasing the PbCl<sub>2</sub> fraction in the exchange reaction (Fig. S36). However, the UV-Vis-NIR absorption and PL emission spectra of the CsPbI<sub>x</sub>Br<sub>3-x</sub> nanocrystals collected by ion exchange with I<sup>-</sup> are red-shifted after the introduction of I<sup>-</sup> ions (Fig. S37). We noticed that the nanocrystals are not stable and the increasing amount of I<sup>-</sup> or Cl<sup>-</sup> ions led to the damping intensity of the shorter wavelength emission.

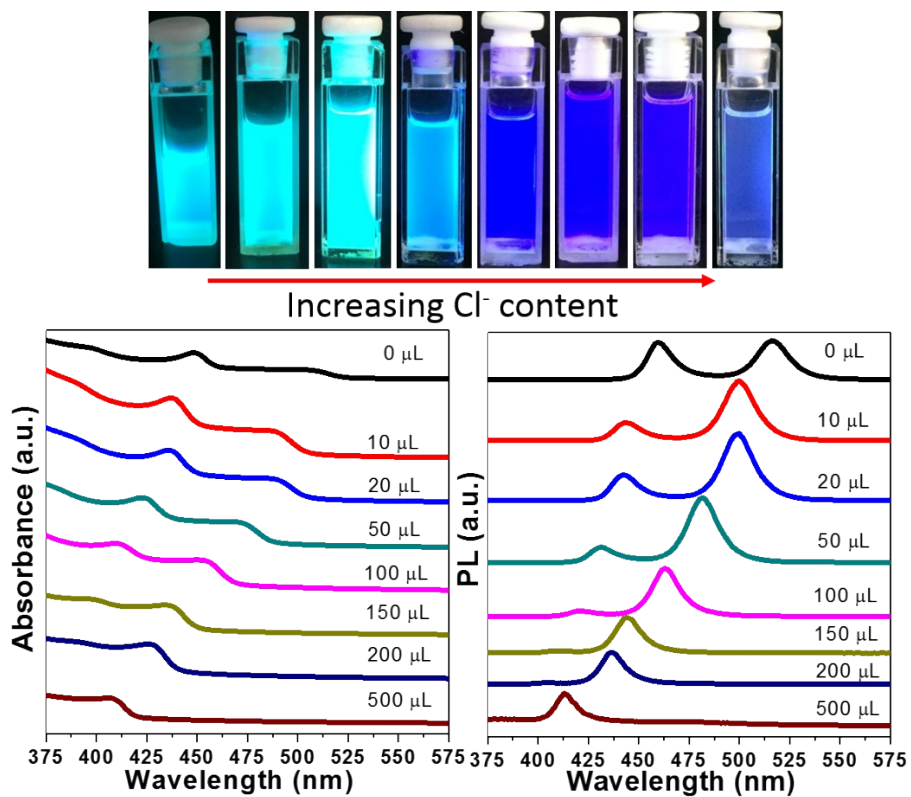

**Fig. S27.** (a) Optical absorbance spectra and (b) PL spectra of the various  $\text{CsPbCl}_x\text{Br}_{3-x}$  nanocrystals achieved by anion exchange of the as-synthesized  $\text{CsPbBr}_3$  in the presence of different amounts of  $\text{Cl}^-$  ions as dictated. The top panel presents the photographs of corresponding nanocrystals dispersed in hexane under UV light illumination (355 nm excitation wavelength).



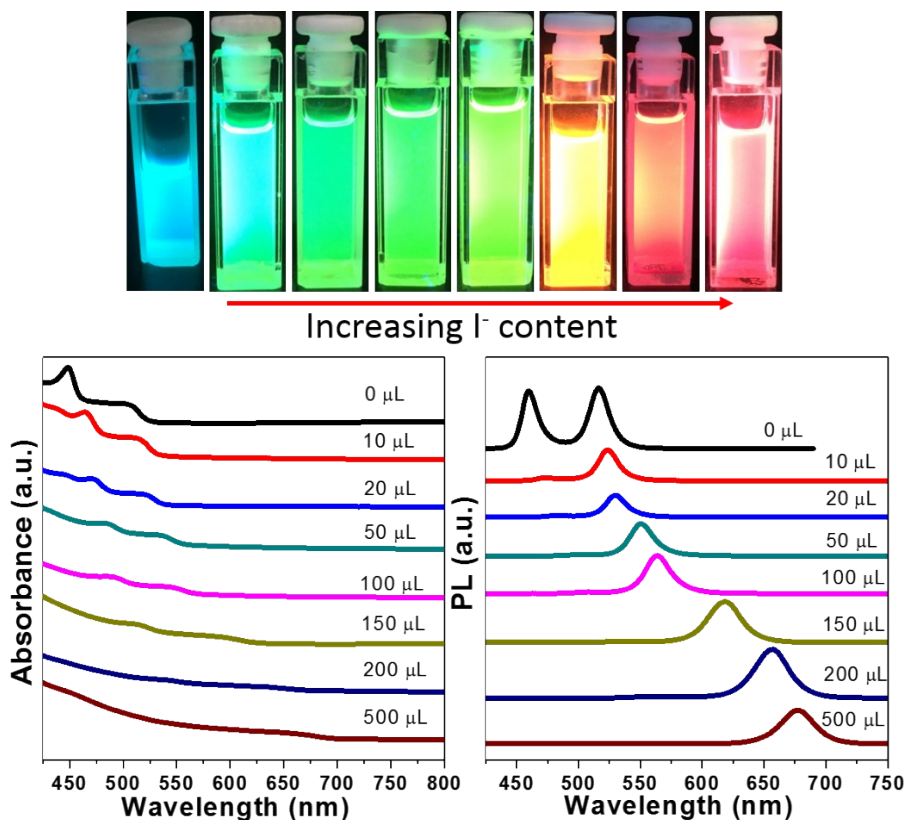

**Fig. S28.** (a) Optical absorbance spectra and (b) PL spectra of the various  $\text{CsPbI}_x\text{Br}_{3-x}$  nanocrystals achieved by anion exchange of the as-synthesized  $\text{CsPbBr}_3$  in the presence of different amounts of  $\text{I}^-$  ions as dictated. The top panel presents the photographs of corresponding nanocrystals dispersed in hexane under UV light illumination (355 nm excitation wavelength).

## References

- [1] Q.A. Akkerman, V. D’Innocenzo, S. Accornero, A. Scarpellini, A. Petrozza, M. Prato, L. Manna, Tuning the Optical Properties of Cesium Lead Halide Perovskite Nanocrystals by Anion Exchange Reactions, *J. Am. Chem. Soc.* 137 (2015) 10276-10281.
